# Supplementary material
Source: PubMed Central journal article supplement (PMC3210886)
Supplement: NIHMS329207-supplement-01.pdf [file NIHMS329207-supplement-01.pdf]

Table S1. Number of amino acid substitutions per subject in Gag during primary HIV-1 subtype C infection.

| Subject       | Fiebig stage | Time of follow-up, days p/s | ART (if any), days p/s initiation | Num of time points | Total amino acid substitutions |              |                | Dominant and fixed substitutions (subset) |         |                |
|---------------|--------------|-----------------------------|-----------------------------------|--------------------|--------------------------------|--------------|----------------|-------------------------------------------|---------|----------------|
|               |              |                             |                                   |                    | Reverse                        | Forward      | Poly-morphisms | Reverse                                   | Forward | Poly-morphisms |
| NA            | V-VI         | 169 – 448                   |                                   | 4                  | 10                             | 26           | 2              | 7                                         | 3       | 0              |
| A             | II           | 6 – 356                     | 181                               | 10                 | 9                              | 25           | 2              | 4                                         | 1       | 2              |
| OC            | IV           | 27 – 482                    |                                   | 6                  | 18                             | 35           | 4              | 8                                         | 1       | 1              |
| OE            | V            | 52 – 236                    | 491                               | 5                  | 18                             | 13           | 6              | 13                                        | 0       | 0              |
| OG            | V            | 104 – 317                   | 450                               | 7                  | 20                             | 43           | 8              | 14                                        | 1       | 2              |
| OJ            | IV           | 44 – 316                    |                                   | 4                  | 10                             | 16           | 3              | 7                                         | 0       | 0              |
| B             | II           | 10 – 223                    | 199                               | 6                  | 5                              | 22           | 3              | 2                                         | 0       | 0              |
| OM            | V-VI         | 86 – 178                    |                                   | 2                  | 3                              | 4            | 1              | 1                                         | 1       | 0              |
| OQ            | V            | 52 – 415                    | 270                               | 5                  | 16                             | 20           | 1              | 14                                        | 3       | 0              |
| OS            | V            | 62 – 494                    |                                   | 6                  | 16                             | 39           | 3              | 15                                        | 4       | 0              |
| OU            | IV           | 13 – 471                    |                                   | 7                  | 6                              | 42           | 9              | 1                                         | 2       | 0              |
| OW            | IV           | 13 – 469                    |                                   | 6                  | 14                             | 38           | 7              | 11                                        | 3       | 4              |
| OX            | V            | 58 – 464                    |                                   | 6                  | 8                              | 18           | 2              | 6                                         | 3       | 1              |
| OY            | V            | 51 – 423                    |                                   | 7                  | 23                             | 21           | 8              | 20                                        | 0       | 3              |
| OZ            | V            | 78 – 395                    |                                   | 6                  | 20                             | 22           | 1              | 14                                        | 2       | 0              |
| C             | II           | 4 – 445                     | 362                               | 7                  | 9                              | 22           | 0              | 6                                         | 1       | 0              |
| O1            | IV           | 6 – 312                     |                                   | 5                  | 4                              | 23           | 0              | 1                                         | 0       | 0              |
| PA            | V            | 65 – 227                    |                                   | 4                  | 9                              | 6            | 0              | 6                                         | 0       | 0              |
| E             | II           | 30 – 404                    |                                   | 8                  | 21                             | 22           | 4              | 15                                        | 4       | 2              |
| PC            | V            | 54 – 418                    | 388                               | 6                  | 11                             | 15           | 6              | 9                                         | 0       | 2              |
| F             | II           | 7 – 447                     |                                   | 7                  | 7                              | 14           | 2              | 6                                         | 4       | 0              |
| PD            | V            | 59 – 428                    |                                   | 5                  | 1                              | 3            | 2              | 0                                         | 1       | 1              |
| G             | II           | 4 – 438                     |                                   | 6                  | 5                              | 15           | 4              | 3                                         | 2       | 0              |
| PK            | V            | 47 – 195                    |                                   | 4                  | 5                              | 7            | 3              | 4                                         | 3       | 0              |
| D             | II           | 6 – 483                     |                                   | 7                  | 26                             | 15           | 5              | 7                                         | 4       | 1              |
| PO            | IV           | 6 – 277                     |                                   | 5                  | 3                              | 14           | 1              | 0                                         | 3       | 0              |
| PP            | V            | 44 – 226                    |                                   | 4                  | 24                             | 26           | 2              | 14                                        | 4       | 1              |
| QA            | IV           | 6 – 389                     | 150                               | 5                  | 1                              | 18           | 8              | 1                                         | 0       | 2              |
| QC            | V            | 80 – 415                    |                                   | 3                  | 4                              | 25           | 1              | 1                                         | 2       | 1              |
| QD            | V-VI         | 79 – 420                    |                                   | 4                  | 5                              | 12           | 1              | 2                                         | 0       | 0              |
| QG            | V            | 48 – 415                    |                                   | 5                  | 2                              | 3            | 0              | 2                                         | 0       | 0              |
| H             | II           | 16 – 347                    |                                   | 6                  | 4                              | 10           | 3              | 3                                         | 0       | 1              |
| QI            | IV           | 20 – 476                    | 112                               | 5                  | 6                              | 5            | 0              | 5                                         | 0       | 0              |
| QJ            | IV           | 8 – 471                     |                                   | 7                  | 1                              | 16           | 1              | 0                                         | 4       | 0              |
| QM            | V            | 48 – 415                    |                                   | 4                  | 1                              | 4            | 0              | 0                                         | 0       | 0              |
| QP            | V            | 48 – 414                    |                                   | 4                  | 7                              | 25           | 3              | 4                                         | 3       | 0              |
| QR            | IV           | 7 – 485                     |                                   | 5                  | 16                             | 26           | 0              | 16                                        | 5       | 0              |
| QS            | V            | 44 – 351                    |                                   | 5                  | 1                              | 13           | 0              | 1                                         | 1       | 0              |
| QT            | V            | 44 – 349                    |                                   | 5                  | 2                              | 15           | 2              | 0                                         | 1       | 0              |
| QU            | V-VI         | 84 – 266                    |                                   | 4                  | 10                             | 14           | 0              | 8                                         | 0       | 0              |
| RA            | V            | 54 – 422                    |                                   | 6                  | 6                              | 29           | 1              | 2                                         | 0       | 0              |
| RB            | V            | 52 – 332                    | 424                               | 4                  | 6                              | 21           | 5              | 5                                         | 2       | 3              |
| Median (IQR): |              |                             | 316 (185-415)                     |                    | 7 (4-15.5)                     | 18 (15.3-25) | 2 (1-4)        | 5 (1.3-8.8)                               | 1 (0-3) | 0 (0-1)        |
